# Supplementary material
Source: publisher figshare collection journal article supplement (https://tandf.figshare.com/ndownloader/files/18505319)
Supplement: Supplementary file 1 [file 18505319]

**Supplementary table S 1. Baseline characteristics of the sample**

|                                     |                                       |              |
|-------------------------------------|---------------------------------------|--------------|
| <b>Age (years)</b>                  | <b>20-29</b>                          | 623 (12.7%)  |
|                                     | <b>30-39</b>                          | 957 (19.5%)  |
|                                     | <b>40-49</b>                          | 1055 (21.5%) |
|                                     | <b>50-59</b>                          | 836 (17%)    |
|                                     | <b>60-69</b>                          | 683 (13.9%)  |
|                                     | <b>70-79</b>                          | 462 (9.4%)   |
|                                     | <b>≥80</b>                            | 300 (6.1%)   |
| <b>Male sex</b>                     |                                       | 2238 (45.5%) |
| <b>Residence in rural area</b>      |                                       | 1107 (22.5%) |
| <b>Geographical area of Spain</b>   | <b>North</b>                          | 1412 (28.7%) |
|                                     | <b>Mediterranean + Canary Islands</b> | 2063 (42%)   |
|                                     | <b>Center</b>                         | 1441 (29.3%) |
| <b>Born in Spain</b>                |                                       | 4572 (93%)   |
| <b>Educational level</b>            | <b>Basic</b>                          | 1796 (37.3%) |
|                                     | <b>Intermediate</b>                   | 1159 (26%)   |
|                                     | <b>Higher</b>                         | 1687 (36.7%) |
| <b>BMI</b>                          | <b>Underweight (BMI&lt;18.5)</b>      | 47 (1.1%)    |
|                                     | <b>Normal weight (18.5≤BMI&lt;25)</b> | 1902 (42.7%) |
|                                     | <b>Overweight (25≤BMI&lt;30)</b>      | 1809 (40.7%) |
|                                     | <b>Obesity (BMI ≥30)</b>              | 692 (15.6%)  |
| <b>Smoking habit</b>                | <b>Daily smoker</b>                   | 998 (21.5%)  |
|                                     | <b>Occasional smoker</b>              | 114 (2.5%)   |
|                                     | <b>Ex-smoker</b>                      | 1293 (27.8%) |
|                                     | <b>Never smoker</b>                   | 2242 (48.2%) |
| <b>Daily alcohol consumption</b>    |                                       | 643 (22.2%)  |
| <b>Self-perceived health status</b> | <b>Very good</b>                      | 772 (16.6%)  |
|                                     | <b>Good</b>                           | 2356 (50.7%) |
|                                     | <b>Normal</b>                         | 1165 (25.1%) |
|                                     | <b>Poor</b>                           | 259 (5.6%)   |
|                                     | <b>Very poor</b>                      | 95 (2%)      |

Variables presented as n (%). BMI: body mass index
